# Supplementary material for: Mutation in CEP63 co-segregating with developmental dyslexia in a Swedish family
Source: PubMed Central journal article supplement (PMC4628622; doi:10.1007/s00439-015-1602-1), 2015-09-23

I

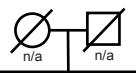

II

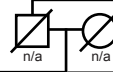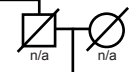

III

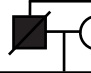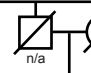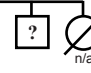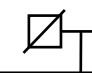

IV

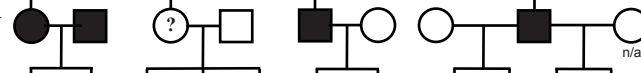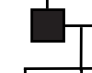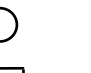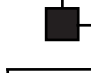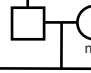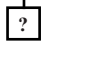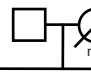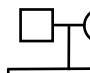

VI

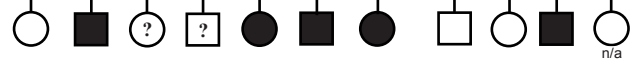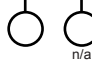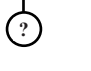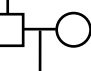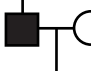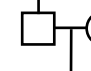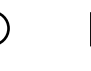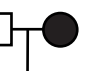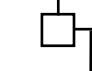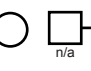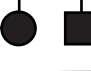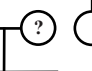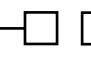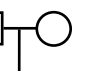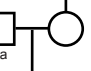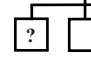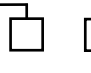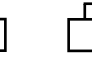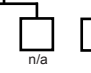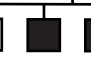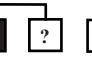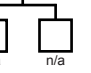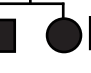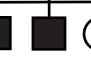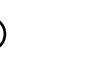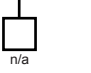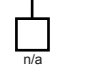

Supplement: 439_2015_1602_MOESM1_ESM.pdf [file 439_2015_1602_MOESM1_ESM.pdf]
