# Supplementary material for: Mutation in CEP63 co-segregating with developmental dyslexia in a Swedish family
Source: PubMed Central journal article supplement (PMC4628622; doi:10.1007/s00439-015-1602-1), 2015-09-23

Extracellular Space

Plasma Membrane

Cytoplasm

Nucleus

Other

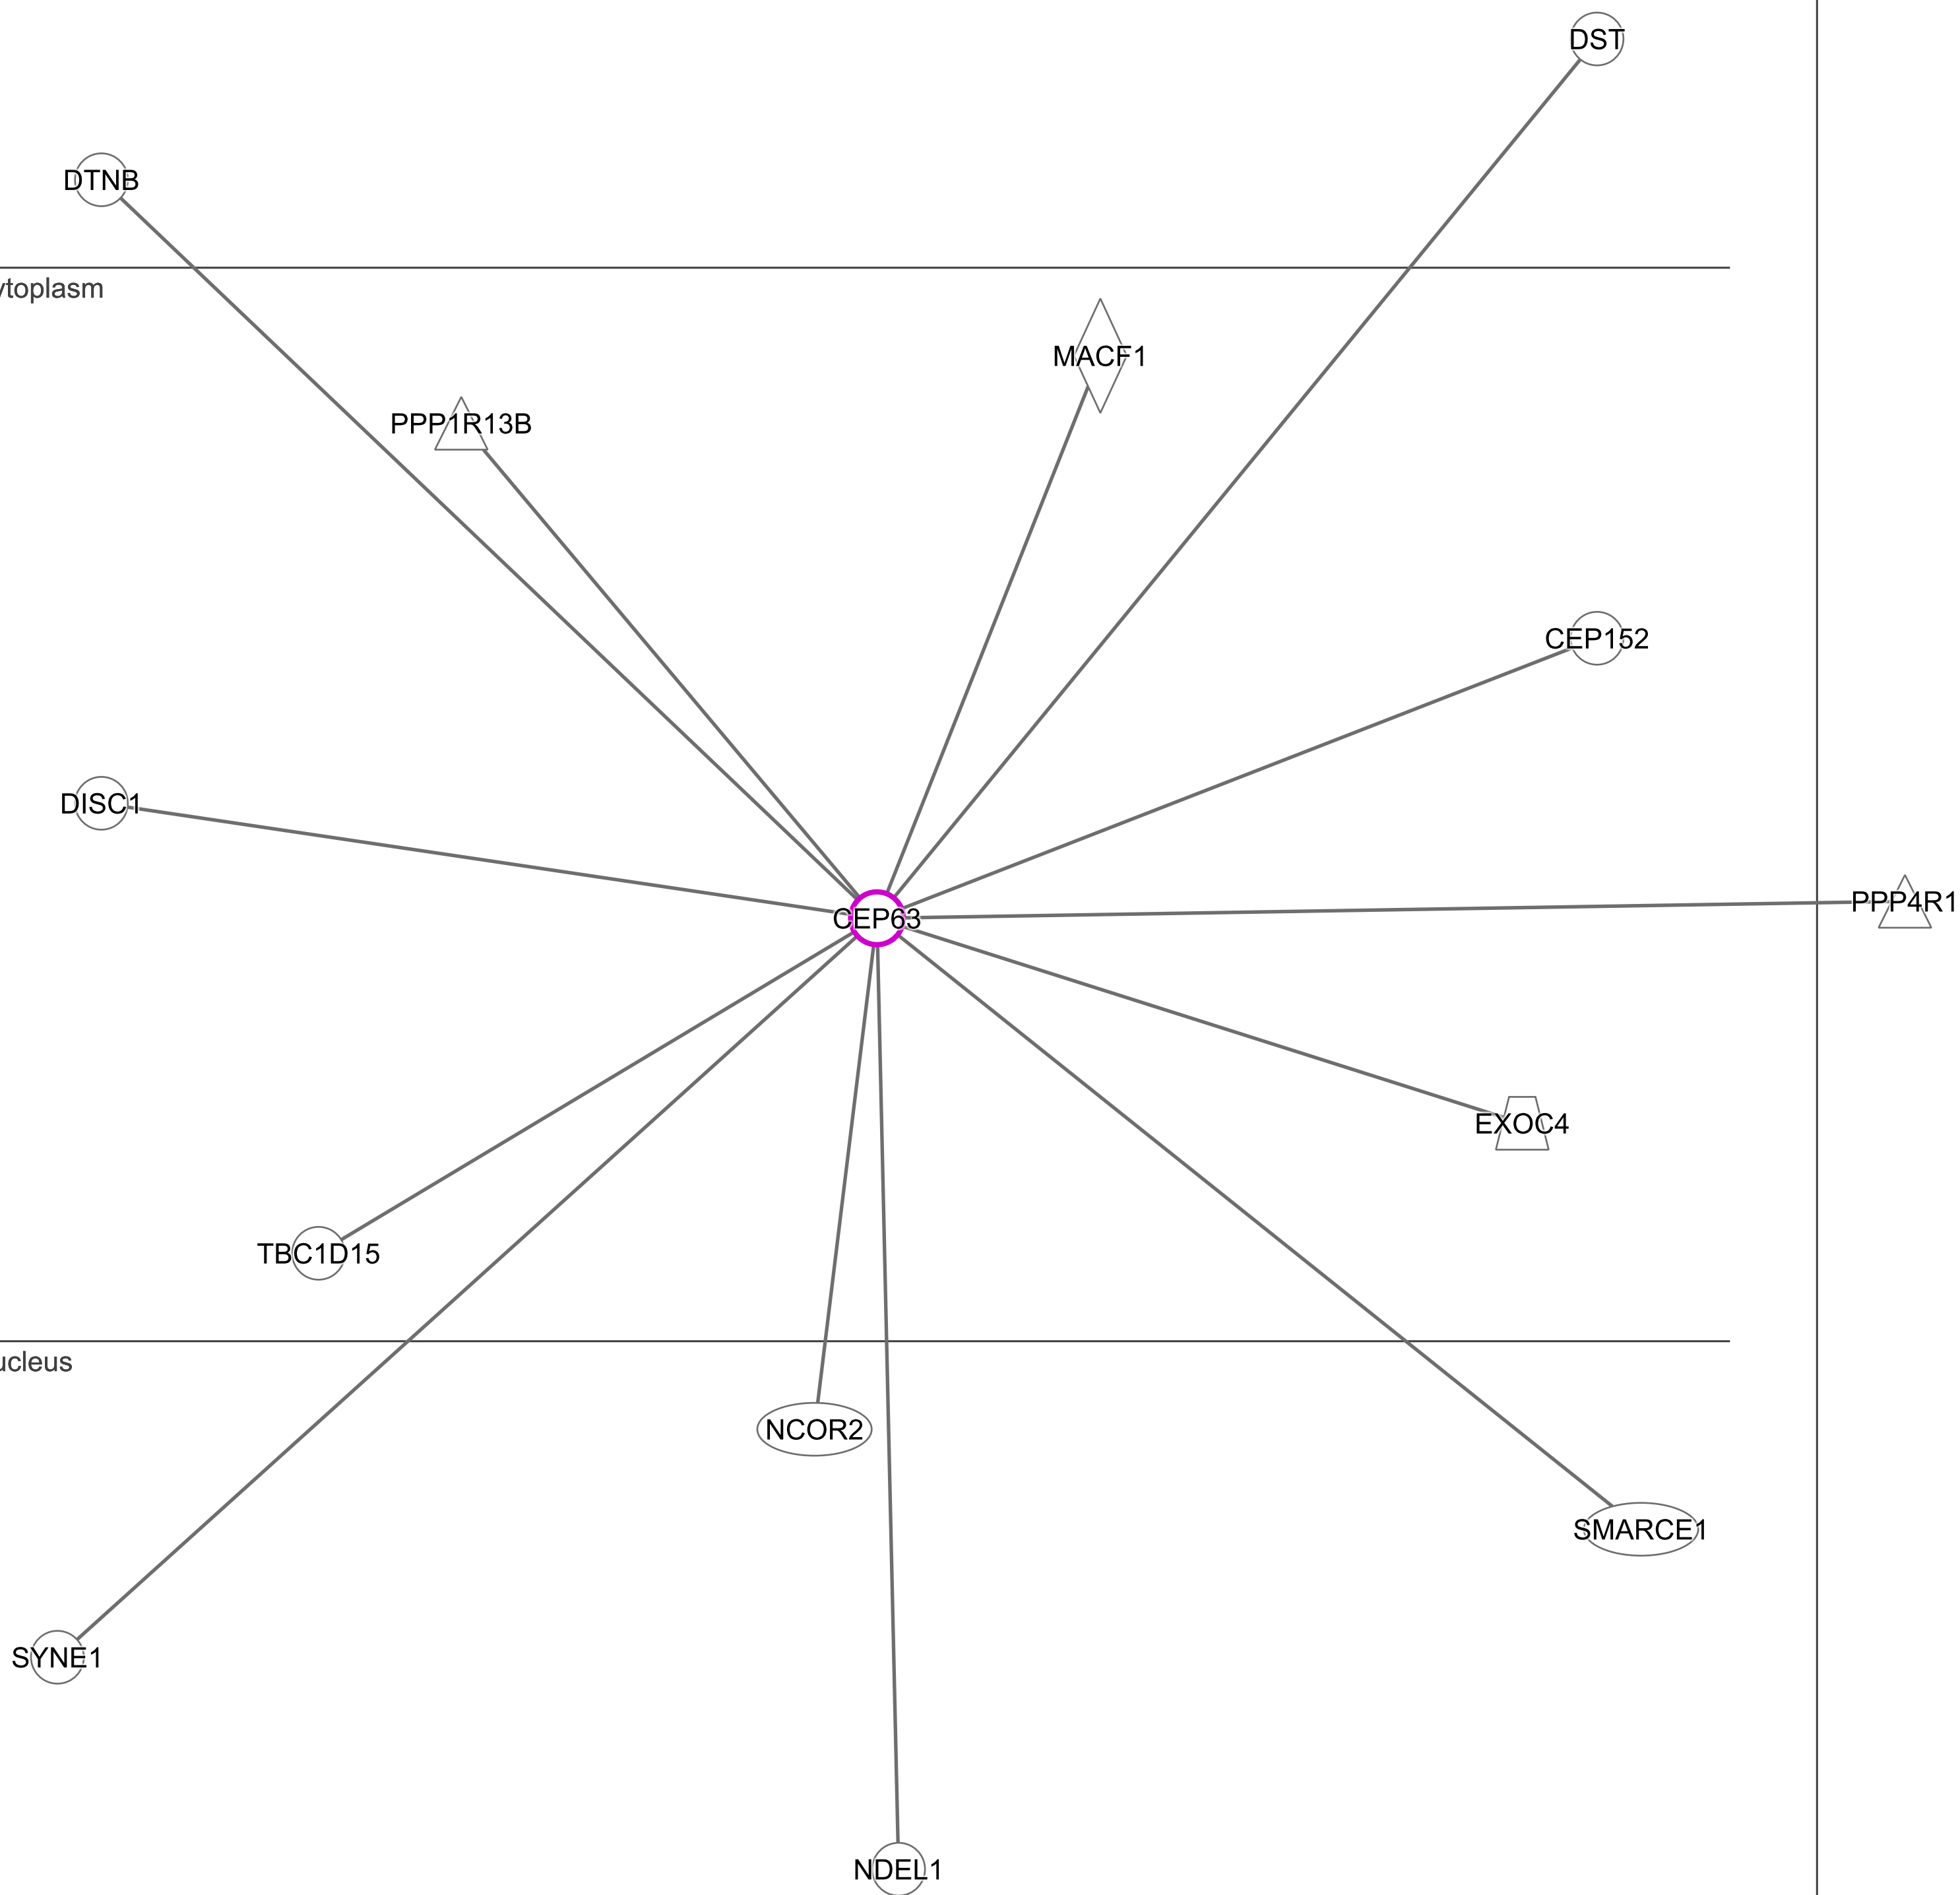

Supplement: 439_2015_1602_MOESM4_ESM.pdf [file 439_2015_1602_MOESM4_ESM.pdf]
