# Supplementary material for: Mutation in CEP63 co-segregating with developmental dyslexia in a Swedish family
Source: PubMed Central journal article supplement (PMC4628622; doi:10.1007/s00439-015-1602-1), 2015-09-23
Supplement: 439_2015_1602_MOESM8_ESM.pdf [file 439_2015_1602_MOESM8_ESM.pdf]

| Symbol   | Ensembl Hs ID                   | Description                                                                                       |
|----------|---------------------------------|---------------------------------------------------------------------------------------------------|
| MACF1    | <a href="#">ENSG00000127603</a> | microtubule-actin crosslinking factor 1                                                           |
| EXOC4    | <a href="#">ENSG00000131558</a> | exocyst complex component 4                                                                       |
| DTNB     | <a href="#">ENSG00000138101</a> | dystrobrevin, beta                                                                                |
| SYNE1    | <a href="#">ENSG00000131018</a> | spectrin repeat containing, nuclear envelope 1                                                    |
| DISC1    | <a href="#">ENSG00000162946</a> | disrupted in schizophrenia 1                                                                      |
| NCOR2    | <a href="#">ENSG00000196498</a> | nuclear receptor corepressor 2                                                                    |
| SMARCE1  | <a href="#">ENSG00000073584</a> | SWI/SNF related, matrix associated, actin dependent regulator of chromatin, subfamily e, member 1 |
| CEP152   | <a href="#">ENSG00000103995</a> | centrosomal protein 152kDa                                                                        |
| DST      | <a href="#">ENSG00000151914</a> | dystonin                                                                                          |
| PPP1R13B | <a href="#">ENSG00000088808</a> | protein phosphatase 1, regulatory (inhibitor) subunit 13B                                         |
| TBC1D15  | <a href="#">ENSG00000121749</a> | TBC1 domain family, member 15                                                                     |
| PPP4R1   | <a href="#">ENSG00000154845</a> | protein phosphatase 4, regulatory subunit 1                                                       |
| NDEL1    | <a href="#">ENSG00000166579</a> | nudE nuclear distribution gene E homolog (A. nidulans)-like 1                                     |
